# Supplementary material for: Neurotoxicity of Combined Exposure to the Heavy Metals (Pb and As) in Zebrafish (Danio rerio)
Source: MDPI journal article supplement (doi:10.3390/toxics12040282), 2024-04-11
Supplement: s1 [file s1]

# **Neurotoxicity of Combined Exposure to the Heavy Metals (Pb and As) in Zebrafish (*Danio rerio*)**

Ming Liu<sup>1#</sup>, Ping Deng<sup>3#</sup>, Guangyu Li<sup>1</sup>, Haoling Liu<sup>1</sup>, Junli Zuo<sup>1</sup>, Wenwen Cui<sup>2</sup>,  
Huixian Zhang<sup>2</sup>, Xin Chen<sup>2</sup>, Jingjing Yao<sup>2</sup>, Xitian Peng<sup>2</sup>, Lijun Peng<sup>2</sup>, Jiao Liu<sup>2</sup>,  
Wenting Zheng<sup>1</sup>, Wei Yan<sup>2\*</sup>, Ning Luan<sup>1\*</sup>

<sup>1</sup>College of Fisheries, Huazhong Agricultural University, Wuhan, 430070, China

<sup>2</sup>Institute of Quality Standard and Testing Technology for Agro-Products, Hubei  
Academy of Agricultural Sciences, Hubei Key Laboratory of Nutritional Quality and  
Safety of Agro-products, Wuhan, 430064, Hubei, China

<sup>3</sup>Study and practical demonstration on regime shifts and optimization of  
ecosystem after ecological restoration project 'turning fishpond to wetland' in Chenhu  
Lake, Wuhan Academy of Agricultural Sciences, Wuhan, 430056, China

\*Corresponding Author:

Ning Luan (N. Luan)

College of Fisheries,

Huazhong Agricultural University,

Wuhan 430070, China

Fax: 86-27-87282114

Email: luanning@webmail.hzau.edu.cn

Wei Yan (W. Yan) PhD

Hubei Key Laboratory of Nutritional Quality and Safety of Agro-products,

Hubei Academy of Agricultural Sciences,

Wuhan 430064, China

Fax: 027-87389465

Email: yanwei75126@163.com

#These two authors contribute equally to this work

\*These two authors contribute equally to this work

**Table S1.** Primer sequences used for qRT-PCR.

| Gene name      | Primer sequences (from 5' to 3')                             |
|----------------|--------------------------------------------------------------|
| syn2a          | F: GTGACCATGCCAGCATTTC<br>R: TGGTTCTCCACTTTCACCTT            |
| pcd18b         | F: GTTGTTCCCATATTTGAAGACGTGC<br>R: CCTCTTACCTCAGTTACAATTTATA |
| shha           | F: GCAAGATAACGCGCAATTCGGAGA<br>R: TGCATCTCTGTGTCATGAGCCTGT   |
| gfap           | F: GGATGCAGCCAATCGTAAT<br>R: TTCCAGGTCACAGGTCAG              |
| acth           | F: AATTTGCACTTGCCTATG<br>R: CCCTTTGTAGCGTCATT                |
| crh            | F: TTCGGGAAGTAACCACAAGC<br>R: CTGCACTCTATTGCGCTTCC           |
| manf           | F:AGATGGAGAGTGTGAAGTCTGTGTG<br>R: CAATTGAGTCGCTGTCAAACTTG    |
| ache           | F:CCCTCCAGTGGGTACAAGAA<br>R: GGGCCTCATCAAAGGTAACA            |
| gap43          | F: TGCTGCATCAGAAGAACTAA<br>R:CCTCCGGTTTGATTCCATC             |
| $\beta$ -actin | F: ATGGATGAGGAAATCGCTGCC<br>R: CTCCCTGATGTCTGGGTCGTC         |
| elavl3         | F:AGACAAGATCACAGGCCAGAGCTT<br>R:TGGTCTGCAGTTTGAGACCGTTGA     |
| nr4a2b         | F:GAAGACGGCGAAATCGATGC<br>R:CTGGCGGTTCTGACAACTTCC            |

**Table S2.** The temperature, pH and ammonia nitrogen content in the experimental water before and after water renewed (n = 3).

|                                 | Before        | After       |
|---------------------------------|---------------|-------------|
| Ammonia nitrogen content (mg/L) | 0.7278±0.0907 | 0.395±0.046 |
| pH                              | 6.76±0.041    | 7.18±0.031  |
| T (°C)                          | 24.7±0.2      | 24.5±0.1    |

**Table S3.** The concentrations of fluorescent Pb and As in the exposed water before and after water renewed (n = 3).

| Groups     | Before        |               | After         |               |
|------------|---------------|---------------|---------------|---------------|
|            | As (mg/L)     | Pb (mg/L)     | As (mg/L)     | Pb (mg/L)     |
| 0          | -             | -             | -             | -             |
| Low-Pb     | -             | 0.0194±0.0009 | -             | 0.0304±0.0025 |
| Low-As     | 0.0191±0.0013 | -             | 0.036±0.0075  | -             |
| Low-Pb+As  | 0.0229±0.0014 | 0.0207±0.0024 | 0.0336±0.0019 | 0.0296±0.0004 |
| High-Pb    | -             | 3.0423±0.0681 | -             | 3.7674±0.2688 |
| High-As    | 2.4667±0.0973 | -             | 2.9967±0.1889 | -             |
| High-Pb+As | 2.19±0.0424   | 3.1147±0.0471 | 3.3133±0.2518 | 3.9864±0.0215 |
